# Supplementary material for: Phage selection restores antibiotic sensitivity in MDR Pseudomonas aeruginosa
Source: Springer Nature journal article supplement (doi:10.1038/srep26717), 2016-05-26
Supplement: 41598_2016_BFsrep26717_MOESM1_ESM.pdf [file 41598_2016_BFsrep26717_MOESM1_ESM.pdf]

**Title: Phage selection restores antibiotic sensitivity in MDR *Pseudomonas aeruginosa***

**Authors:** Benjamin K. Chan<sup>1</sup>, Mark Sstrom<sup>2</sup>, John E. Wertz<sup>3</sup>, Kaitlyn E. Kortright<sup>4</sup>, Deepak Narayan<sup>5</sup>, and Paul E. Turner<sup>1,6\*</sup>

### Supplementary Information

Appendix 1: Summary of strains used for the selection analysis, including GenBank Assembly number, source and country, date and isolation notes where known.

| Strain Name | GenBank Accession | Source                                          | Country   | Collection Date | Notes                                         |
|-------------|-------------------|-------------------------------------------------|-----------|-----------------|-----------------------------------------------|
| VRFPA01     | GCA_000335395.3   | Sankara Nethralaya Vision Research Foundation   | India     | 2012            | blood isolate from Indian septicemia patient  |
| AZPAE15042  | GCA_000790465.1   | AstraZeneca                                     | USA       | unknown         | cystic fibrosis isolate                       |
| PA7         | GCA_000017205.1   | J. Craig Venter Institute                       | Argentina | unknown         | non-respiratory clinical isolate              |
| 19660       | GCA_000481765.1   | Broad Institute                                 | USA       | unknown         | Cornea/ocular infection                       |
| 19br        | GCA_000223945.2   | IBIS, Universite Laval                          | unknown   | unknown         | unknown                                       |
| AZPAE14903  | GCA_000791145.1   | AstraZeneca                                     | Spain     | 2008            | itra-abdominal tract infection                |
| P2-L230/95  | GCA_000760505.2   | Center for Cellular and Molecular Biology(CCMB) | India     | 1995            | Obtained from Keratitis Patient               |
| PA38182     | GCA_000531435.1   | University of London                            | UK        | unknown         | resistant to antibiotics other than colistin  |
| X24509      | GCA_000481865.1   | Broad Institute                                 | USA       | unknown         | UTI patient                                   |
| BWHPSA028   | GCA_000481145.1   | Broad Institute                                 | USA       | 2013            | Isolated from Sputum                          |
| C41         | GCA_000480455.1   | Broad Institute                                 | unknown   | unknown         | Environmental isolate                         |
| CF27        | GCA_000481905.1   | Broad Institute                                 | USA       | unknown         | Cystic fibrosis patient                       |
| BWHPSA022   | GCA_000481265.1   | Broad Institute                                 | USA       | 2013            | Sputum isolated                               |
| DQ8         | GCA_000283055.1   | Shanghai Jiao Tong University                   | China     | unknown         | soil isolated                                 |
| PA01        | GCA_000006765.1   | PathoGenesis Corporation                        | Australia | 1955            | wound isolated                                |
| PDR         | GCA_000783275.1   | China CDC                                       | China     | unknown         | isolate from a patient with urinary infection |
| BWHPSA037   | GCA_000520455.1   | Broad Institute                                 | USA       | 2013            | bronchoalveolar lavage                        |
| CF77        | GCA_000480375.1   | Broad Institute                                 | USA       | 2005            | cystic fibrosis isolate                       |
| LESB58      | GCA_000026645.1   | Wellcome Trust Sanger Institute                 | UK        | 1988            | cystic fibrosis isolate                       |
| NCMG1179    | GCA_000291745.1   | National Center for Global Health and Medicine  | Japan     | 2010            | isolated from inpatient respiratory tract     |
| AZPAE14698  | GCA_000794705.1   | AstraZeneca                                     | Israel    | unknown         | respiratory tract infection                   |

|            |                 |                                                       |           |         |                                               |
|------------|-----------------|-------------------------------------------------------|-----------|---------|-----------------------------------------------|
| C23        | GCA_000480495.1 | Broad Institute                                       | unknown   | unknown | Environmental isolate                         |
| PS42       | GCA_000520195.1 | Broad Institute                                       | Venezuela | unknown | Environmental isolate                         |
| Stone130   | GCA_000478465.2 | Broad Institute                                       | unknown   | unknown | unknown                                       |
| B13633     | GCA_000359505.1 | National Tsing Hua University                         | unknown   | unknown | infant with community-acquired diarrhea       |
| VRFPA04    | GCA_000473745.3 | Vision Research Foundation, Sankara Nethralaya        | India     | unknown | Isolated from Human corneal button            |
| BL04       | GCA_000481065.1 | Broad Institute                                       | USA       | unknown | isolated from eye                             |
| PABL056    | GCA_000290555.1 | Northwestern University Feinberg School of Medicine   | USA       | 2001    | isolated from blood                           |
| BL13       | GCA_000480885.1 | Broad Institute                                       | USA       | unknown | isolated from eye                             |
| P7L63396   | GCA_000760495.2 | Center for Cellular and Molecular Biology(CCMB)       | India     | 1996    | isolate from keratitis patient                |
| VRFPA03    | GCA_000467675.1 | Vision Research Foundation, Sankara Nethralaya        | India     | 2012    | Corneal button from corneal keratitis patient |
| VRFPA09    | GCA_000558345.1 | Vision Research Foundation, Sankara Nethralaya        | India     | 2013    | blood sample from patient with septicaemia    |
| BL03       | GCA_000481085.1 | Broad Institute                                       | USA       | unknown | Corneal Scaping                               |
| 39016      | GCA_000148745.1 | Centre for Genomics Research, University of Liverpool | unknown   | unknown | cornea of a patient with ulcerative keratitis |
| AZPAE13850 | GCA_000795435.1 | AstraZeneca                                           | India     | unknown | unknown                                       |
| BL25       | GCA_000480645.1 | Broad Institute                                       | USA       | unknown | isolated from eye                             |
| AZPAE14699 | GCA_000794725.1 | AstraZeneca                                           | USA       | 2012    | itra-abdominal tract infection                |
| UCBPPPA14  | GCA_000014625.1 | Massachusetts General Hospital                        | USA       | unknown | Human clinical isolate                        |
